# Supplementary material
Source: PubMed Central journal article supplement (PMC4702665)
Supplement: JVI.02096-15_zjv999091172so1.pdf [file JVI.02096-15_zjv999091172so1.pdf]

## **Supplemental material**

Table S1 (The list of primers for PCR)

Fig. S1 (The nucleotide sequence alignment of Oka IE62 and IE62 mutants.)

Fig. S2 (The nucleotide sequence alignment of C-terminal region of IE62 and IE62 $\Delta$ S2.)

Fig. S3 (The interaction of the IE62 SRT with EAP results in the formation of globular structures.)

References, supplemental figures

**Table S1. The list of primers for PCR**

| <b>Primers</b> | <b>Sequence</b>                                                    |
|----------------|--------------------------------------------------------------------|
| IE62SRT-F      | 5'-ccggtaccgctagcgcaccatggatacgcgcccgatg-3'                        |
| IE62SRT-R2     | 5'-gggttaaacgctgagtttgctgtctcgatggaccaccga-3'                      |
| IE62SRT-R1     | 5'-gggttaaacgacgactcttggtttttctccactgggct-3'                       |
| IE62N-F1       | 5'-cctctagagctagcgcaccatggatacgcgcccgatg-3'                        |
| IE62N-R1       | 5'-gggaattcacgactcttggtttttctccactgggct-3'                         |
| IE62N-F2       | 5'-gggaattccaaccgggatatcgatccatcagcgggtccc-3'                      |
| IE62N-R2       | 5'-taacggcggtagccgcccgtccggtaggca-3'                               |
| YSRT-F3        | 5'-cctgaattcccggcaccgggtccggagcatctcc-3'                           |
| SRT-F5         | 5'-aacgaattcgttcggcattatccgga-3'                                   |
| SRT-R5         | 5'-gatcgatatccgggttgatatt-3'                                       |
| SRT-F6         | 5'-aacgaattcgttcgtcttcatcctct-3'                                   |
| TAD-P4-F       | 5'-cccgaattcggtagccggtttaaactggcgtcggagaacaagcagcgcgccggctccccg-3' |
| TAD-P4-R       | 5'-cagagccagctgtcgcggcgagagcgctc-3'                                |
| NYFP-F         | 5'-ttgaattcgccaccatggtgagcaagggcga-3'                              |
| NYFP-R         | 5'-ttgcgccgcttaggtaccgtcctcgatgttg-3'                              |
| CYFP-F         | 5'-ttgaattcgccaggatgggcagcgtgcagctc-3'                             |
| CYFP-R         | 5'-ttgcgccgcttaggtaccctgtacagctcgt-3'                              |
| YIE62-F        | 5'-ttgaattcatggatacgcgcccgatgcagcgtct-3'                           |
| YIE62-R2       | 5'-tttctaagaaaaaatgctttattatgttagctcttcgccaacatc-3'                |
| IETAD1-F       | 5'-tttggtaccatggccagccagcgcagcgcacttcgcc-3'                        |
| IETAD89-R2     | 5'-tttgcgccgcttagccggcggccgagggcgaccgc-3'                          |
| YVP16-F        | 5'-tttggtacctcgacggccccccgaccgatgtcagc-3'                          |
| VP16-R2        | 5'-tttgcgccgcttactaccaccgtactcgtcaatt-3'                           |
| YEAP-F         | 5'-cctggtaccatggcccccgtaagaagctgggtggaaggg-3'                      |
| YEAP-R         | 5'-gaagcggccgctaatcctcgtcttctcctcttctcgtcctg-3'                    |
| YETIF-F        | 5'-ggatctagaatgttgctgccggggaagagaacgat-3'                          |
| YETIF-R        | 5'-ggaaagcttcaaatgtcaaacatctggttgagctcatcgcc-3'                    |
| Y62SRT-F       | 5'-cctggtaccatggatacgcgcccgatgcagcgtctaca-3'                       |
| Y62SRT-R3      | 5'-aactaaggatattttggtcgcgaccaccatcatt-3'                           |
| YSRT-F         | 5'-cctggtaccgcacccgggtccggagcatctccatctca-3'                       |
| YSRT-R         | 5'-gaagcggccgctgcctcgtcgtcgtcgtcgtcggagga-3'                       |
| YSRT-R3        | 5'-cctgatatccgggtgctcctcctcgcgcccttcgtcgtcgtcgt-3'                 |

Figure S1

A

```

961
pOka IE62      AGAGCGTTTTTTGGCCCTGCCGGGAAGATCCCACGCACCAGACCCGATTGAGGATGACAGC
IE62          AGAGCGTTTTTTGGCCCTGCCGGGAAGATCCCACGCACCAGACCCGATTGAGGATGACAGC
IE62ΔS        AGAGCGTTTTTTGGCCCTGCCGGGAAGATCCCACGCACCAGACCCGATTGAGGATGACAGC
IE62ΔS-S      AGAGCGTTTTTTGGCCCTGCCGGGAAGATCCCACGCACCAGACCCGATTGAGGATGACAGC
*****

pOka IE62      CCAGTGGAGAAAAAGCCAAAGAGTCGTGAGTTTGTTCGGTCTTCATCCTCTTCTCGTCG
IE62          CCAGTGGAGAAAAAGCCAAAGAGTCGTGAGTTTGTTCGGTCTTCATCCTCTTCTCGTCG
IE62ΔS        CCAGTGGAGAAAAAGCCAAAGAGTCGTGAATTC-----
IE62ΔS-S      CCAGTGGAGAAAAAGCCAAAGAGTCGTGAATTCCCGGCACCCCGGGTCCGGAGCATCTCC
*****

pOka IE62      TGGGGATCGTCATCGGAGGATGAAGACGATGAACCCCGGCGCGTTTCGGTGGGAAGTGAA
IE62          TGGGGATCGTCATCGGAGGATGAAGACGATGAACCCCGGCGCGTTTCGGTGGGAAGTGAA
IE62ΔS        -----
IE62ΔS-S      ATTCATCGTCCTCGTCCTCGTCCTCGATGGACGAGGACGACCAGGGGATGGTGCC

pOka IE62      ACTACAGGCAGCAGGTCCGGACGCGAACACGCCCTTCCCCGTCAAATTCGGATGATTCCG
IE62          ACTACAGGCAGCAGGTCCGGACGCGAACACGCCCTTCCCCGTCAAATTCGGATGATTCCG
IE62ΔS        -----
IE62ΔS-S      GGGGCGAGTAGCTCCTCTTCGTCTCCTCCGACGACAGCGACAGCGACGAAGGGCGGAG

pOka IE62      GACTCAAATGATGGTGGGTCGACGAAACAAAATATCCAACCGGGATATCGATCCATCAGC
IE62          GACTCAAATGATGGTGGGTCGACGAAACAAAATATCCAACCGGGATATCGATCCATCAGC
IE62ΔS        -----CAACCGGGATATCGATCCATCAGC
IE62ΔS-S      GAGGAG-----CAACCGGGATATCGATCCATCAGC
*****

pOka IE62      GGTCCCGATCCGAGGATTCGTAAGACCAAACGCTCTTGCGGGGGAACCGGGGCGCCAGAGA
IE62          GGTCCCGATCCGAGGATTCGTAAGACCAAACGCTCTTGCGGGGGAACCGGGGCGCCAGAGA
IE62ΔS        GGTCCCGATCCGAGGATTCGTAAGACCAAACGCTCTTGCGGGGGAACCGGGGCGCCAGAGA
IE62ΔS-S      GGTCCCGATCCGAGGATTCGTAAGACCAAACGCTCTTGCGGGGGAACCGGGGCGCCAGAGA
*****

pOka IE62      CAGAAATCATTTCCTGCCGCGATCCAGAACCCCGATAATTCCCCCGGTGTCGGGGCCG
IE62          CAGAAATCATTTCCTGCCGCGATCCAGAACCCCGATAATTCCCCCGGTGTCGGGGCCG
IE62ΔS        CAGAAATCATTTCCTGCCGCGATCCAGAACCCCGATAATTCCCCCGGTGTCGGGGCCG
IE62ΔS-S      CAGAAATCATTTCCTGCCGCGATCCAGAACCCCGATAATTCCCCCGGTGTCGGGGCCG
*****

```

1, 380

**Figure S1. The nucleotide sequence alignment of Oka IE62 and IE62 mutants.** (A) The nucleotide sequences of pOka IE62 (Accession: AB097933) (1) are completely the same with the IE62 gene (2) used in this studies. All numbers refer to the number of nucleotide sequence from the first ATG of IE62 gene. Dashes represent gaps introduced for maximal alignment. The serine-rich tracts (SRTs) of VZV IE62 and EHV-1 IEP are in blue and red, respectively. Asterisk (\*), conserved nucleotide sequences. DNA sequencing results of intact IE62 (B), IE62ΔS (C), and IE62ΔS-IEP SRT (IE62ΔS-S) genes (D). The start and end nucleotides of the sequence alignment are indicated by arrows.

Figure S1

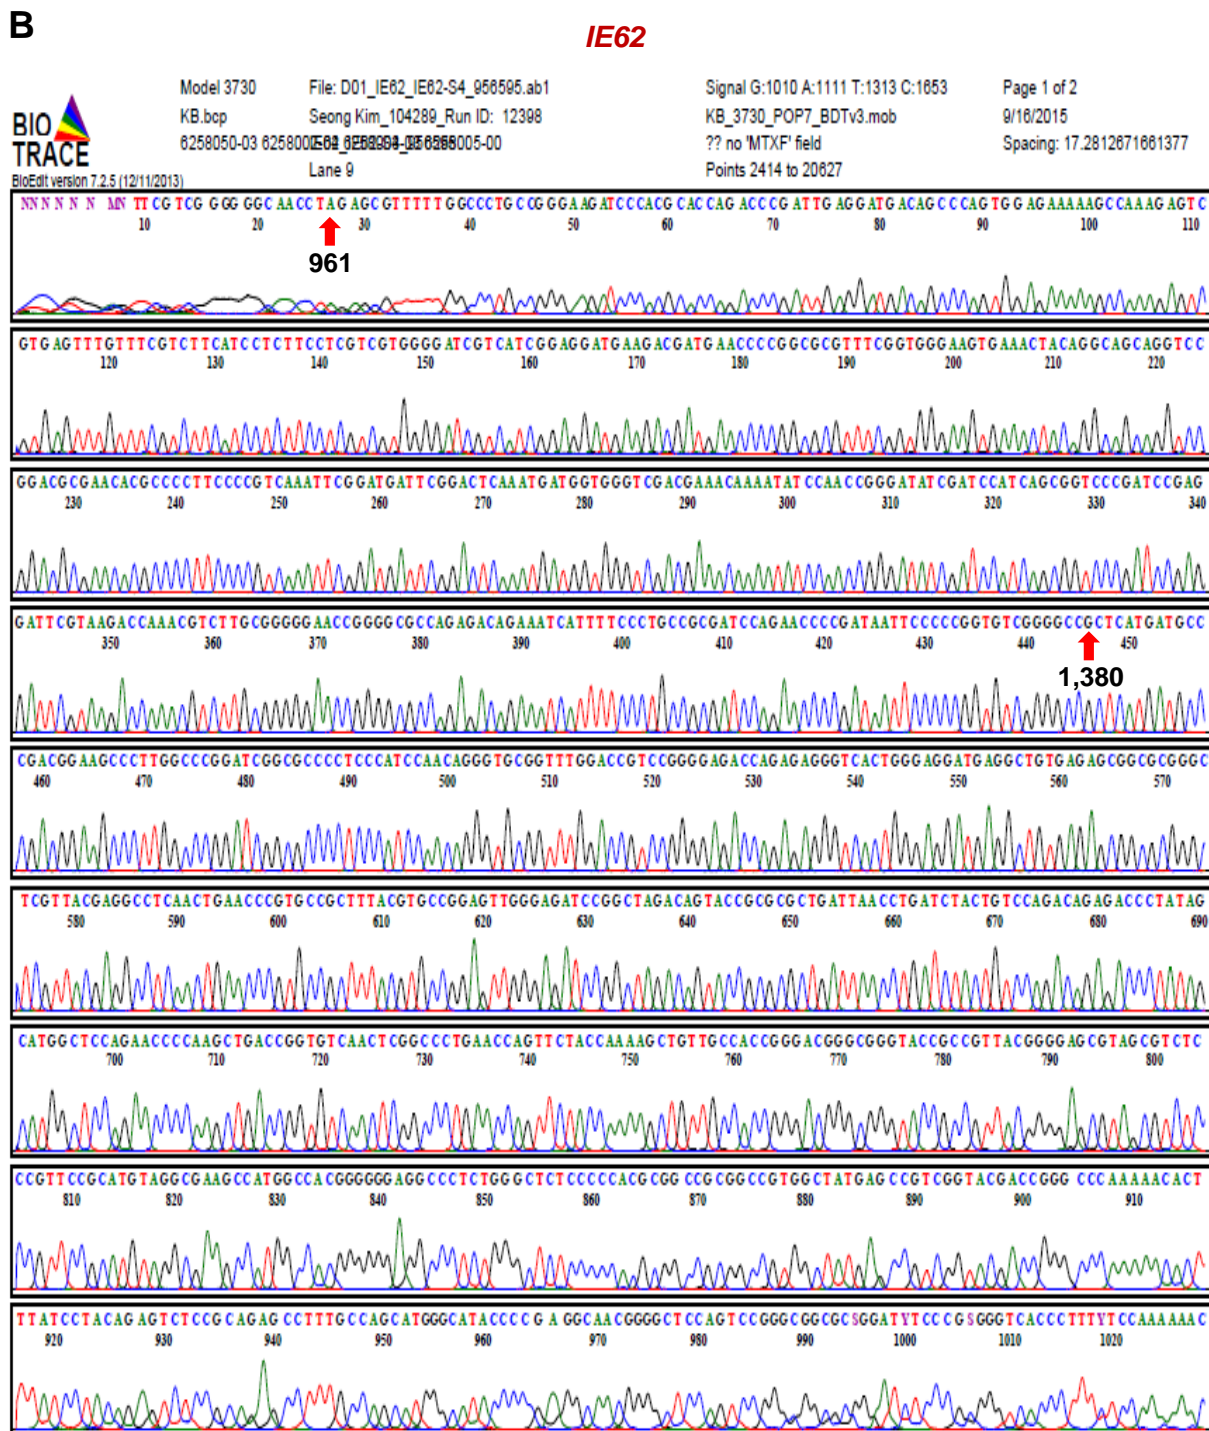

**Figure S1**

**C**

***IE62ΔS***

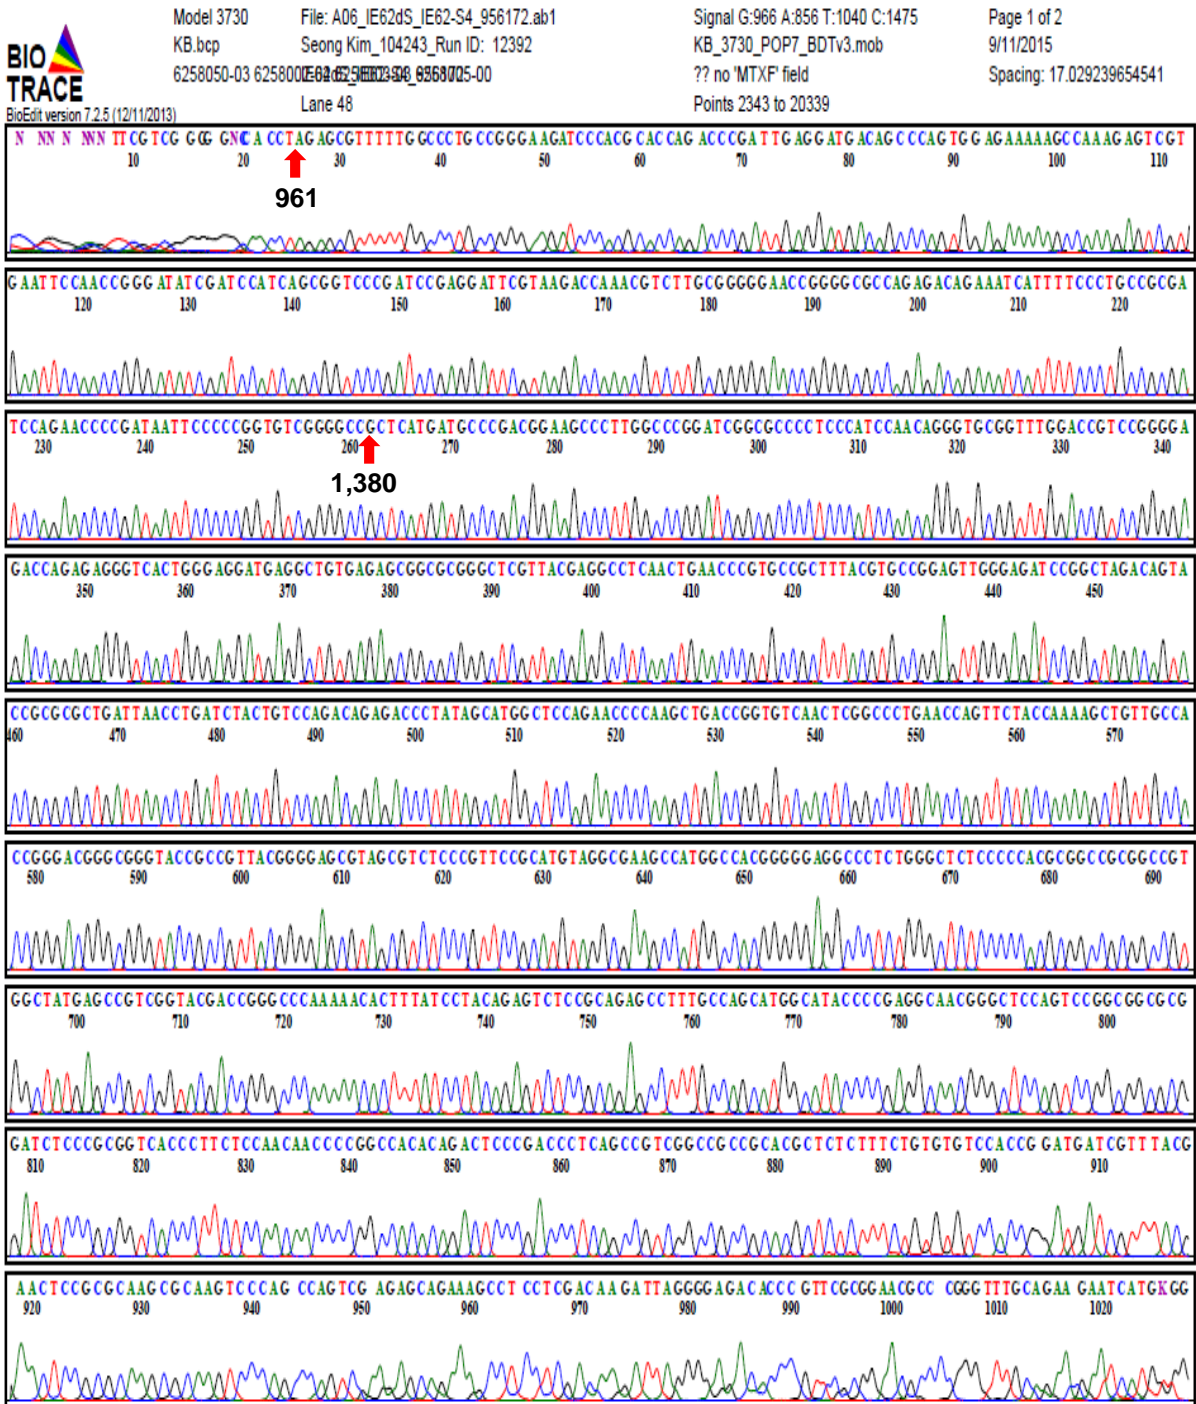

Figure S1

D *IE62ΔS-IEP SRT*

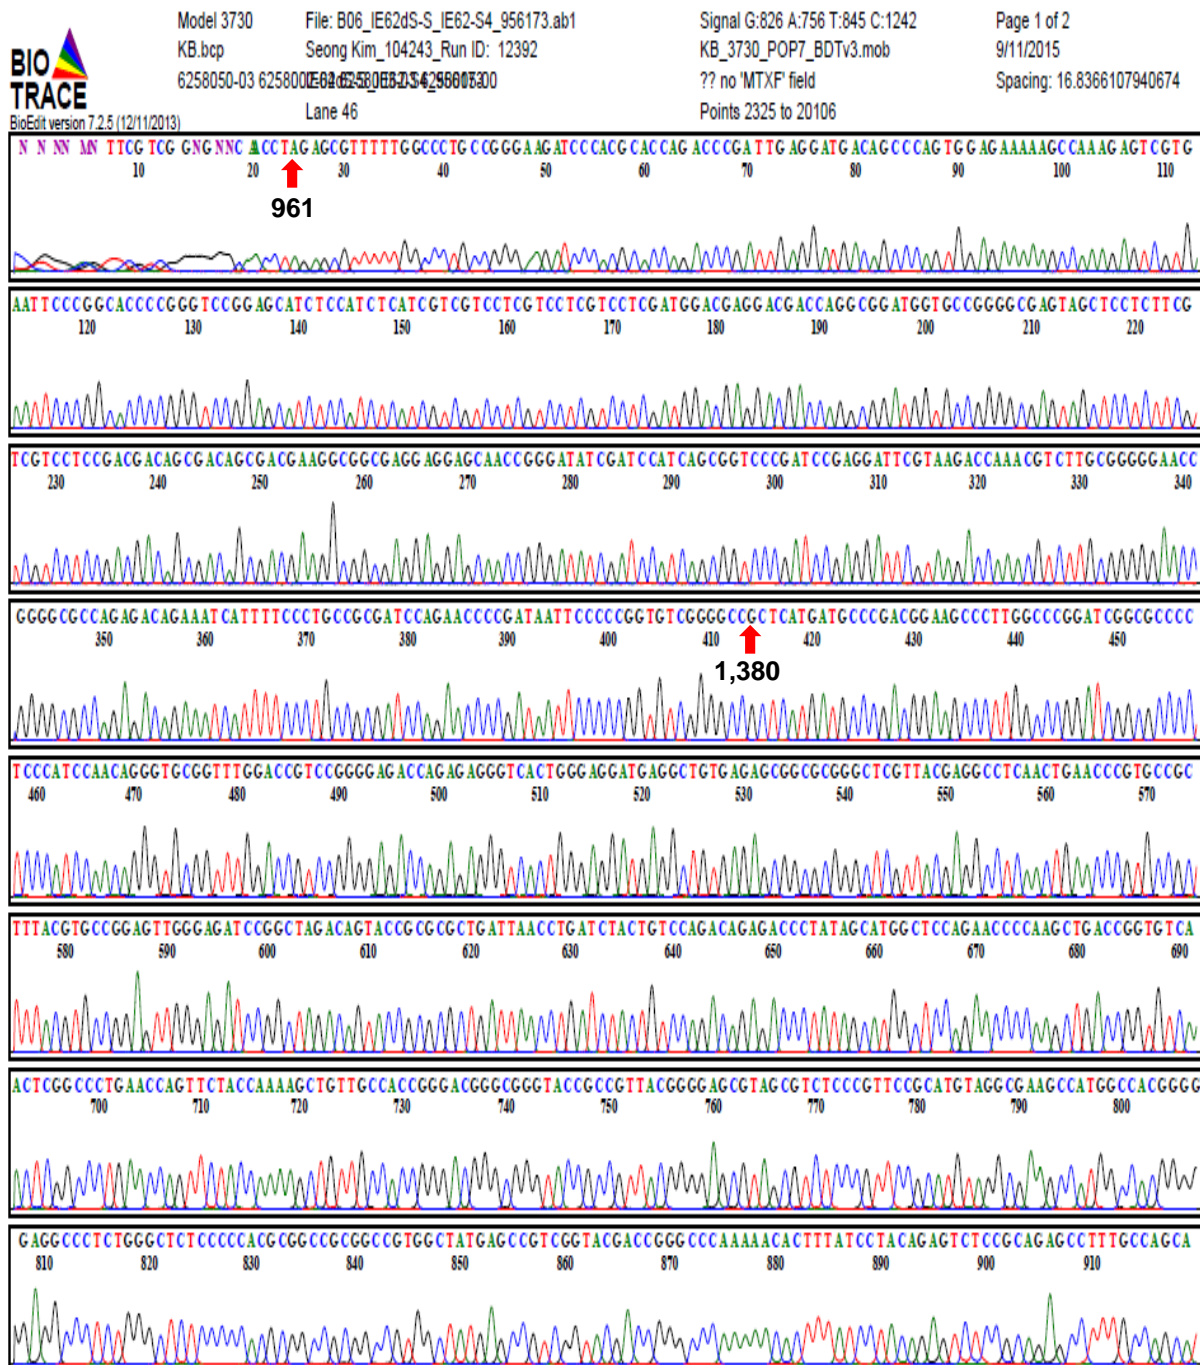

Figure S2

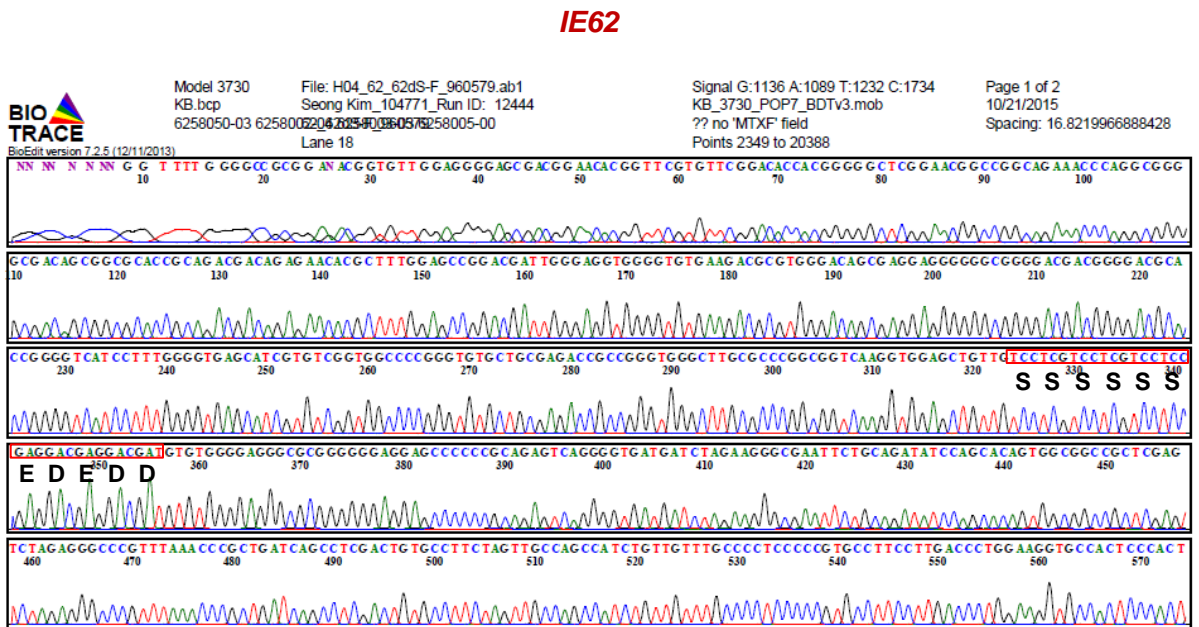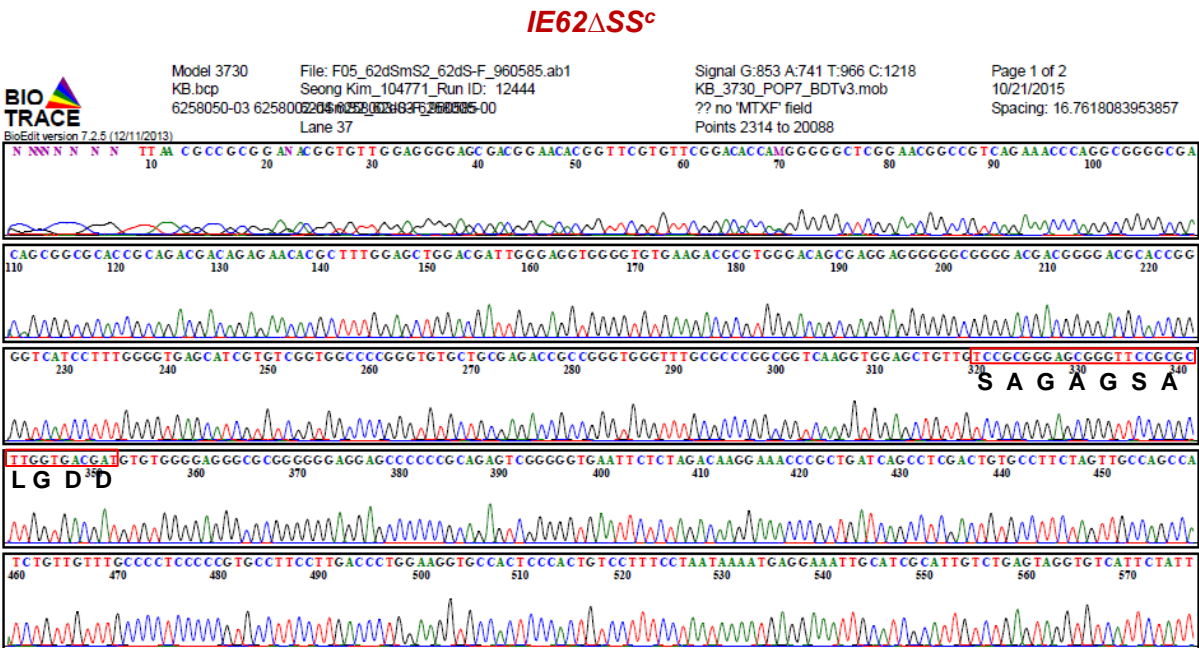

Figure S2. Comparison of C-terminal nucleotide sequences of IE62 and IE62 $\Delta$ SS<sup>c</sup> genes. Eleven amino acid sequences (boxed region: SSSSSSEDEDD) of the SRT<sup>c</sup> of IE62 were mutated to SAGAGSALGDD (SRT<sup>c</sup> of IE62 $\Delta$ SS<sup>c</sup>).

**Figure S3**

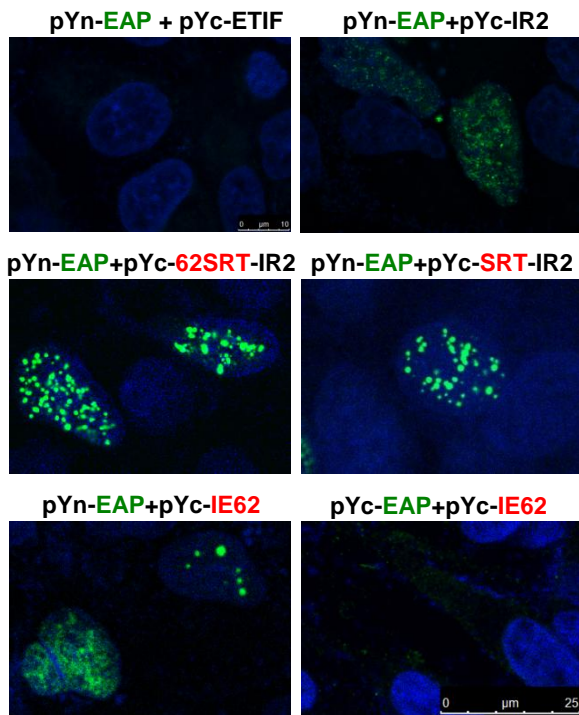

**Figure S3. The interaction of the IE62 SRT with EAP results in the formation of globular structures.** Bimolecular complementation (BiMC) assay to detect the interaction of cellular EAP and SRT-IR2P. Rabbit kidney RK13 cells were cotransfected with the constructs shown above each panel and examined by confocal microscopy at 48h posttransfection.



## References, Supplemental Figures

1. **Gomi Y, Sunamachi H, Mori Y, Nagike K, Takahashi M, Yamanishi K.** 2002. Comparison of the complete DNA sequences of the Oka varicella vaccine and its parental virus. *J Virol* **76**:11447-11459.
2. **Sen N, Sommer M, Che X, White K, Ruyechan WT, Arvin AM.** 2010. Varicella-zoster virus immediate-early protein 62 blocks interferon regulatory factor 3 (IRF3) phosphorylation at key serine residues: a novel mechanism of IRF3 inhibition among herpesviruses. *Journal of virology* **84**:9240-9253.
